# Supplementary material for: Efficacy of aclidinium/formoterol 400/12 µg, analyzed by airflow obstruction severity, age, sex, and exacerbation history: pooled analysis of ACLIFORM and AUGMENT
Source: PubMed Central journal article supplement — Int J Chron Obstruct Pulmon Dis. 2019 Feb 26;14:479–91. doi: 10.2147/COPD.S185502 (PMC6396834; doi:10.2147/copd.s185502), 2019-02-26
Supplement: COPD-14-479-185502-tables.pdf [file COPD-14-479-185502-tables.pdf]

## Supplementary materials

**Table S1 List of Independent Ethics Committees and Institutional Review Boards**

| <b>ACLIFORM (NCT01462942)<sup>a</sup></b> |                                                                                                   |
|-------------------------------------------|---------------------------------------------------------------------------------------------------|
| <b>Country</b>                            | <b>Name and address of IEC/IRB</b>                                                                |
| Austria                                   | Ethikkommission der Medizinischen (central)<br>Universität Graz, Auenbruggerplatz 2, 8036 Graz    |
|                                           | Ethics committee of the Medical University Graz (local)<br>Auenbruggerplatz 2, 8036 Graz          |
|                                           | Ethics committee of the country Salzburg (local)<br>Sebastian- Stief-Gasse 2, 5010 Salzburg       |
| Belgium                                   | Ethisch Comité UZA, Wilrijkstraat 10, Edegem 2650                                                 |
| Bulgaria                                  | Ethics Committee for Multicenter Trials (ECMT) (central)<br>5, “Sveta Nedelya” Square, 1000 Sofia |
|                                           | Local Ethics Committee<br>UMHAT Aleksandrovska EAD, 3, Georgi Sofiyski Str. 1431 Sofia            |
|                                           | Local Ethics Committee<br>SHATTPD-Ruse EOOD, 1, Aleya Lilia Str. 7002 Ruse                        |
|                                           | Local Ethics Committee<br>SHATPFD-Sofia District EOOD, 309, “Slivnitsa” Blvd, 1234 Sofia          |

|                |                                                                                                                                                                                              |
|----------------|----------------------------------------------------------------------------------------------------------------------------------------------------------------------------------------------|
|                | Local Ethics Committee<br>DCC Sveta Anna EOOD, 1, Dimitar Mollov Str. 1709 Sofia                                                                                                             |
|                | Local Ethics Committee<br>DCC “Akta Medika” EOOD, 60, “Nikola Petkov” Str., 5400 Sevlievo                                                                                                    |
| Croatia        | Agency for Medicinal Product and Medical Devices of Croatia<br>Central Ethics Committee, Ksaverska cesta 4, Zagreb, 10000                                                                    |
| Czech Republic | Multicentricka eticka komise Fakultni nemocnice u sv.<br>Anny v Brne, Vystavni 17/19, Brno, 656                                                                                              |
| Denmark        | De Videnskabsetiske Komitéer for Region Hovedstaden<br>Kongens Vænge 2, 3400 Hillerød                                                                                                        |
| Finland        | Keski-Suomen sairaanhoitopiiri, Eettinen toimikunta<br>Sairaan hoitopiirin toimisto Rak. 6/2, Keskussairaalantie 19, 40620 Jyväskylä                                                         |
| France         | Comité de Protection des Personnes Sud Ouest et Outre Mer III<br>Place Amélie Raba-Léon, Groupe Hospitalier Pellegrin – Service de Pharmacologie Clinique, Bât 1 A, Bordeaux<br>cedex, 33076 |
| Germany        | Landesärztekammer Rheinland-Pfalz (central),<br>Postfach 29 26, 55019 Mainz                                                                                                                  |
|                | Landesamt für Gesundheit und Soziales Berlin (local)<br>Geschäftsstelle der Ethik-Kommission des Landes Berlin, Fehrbelliner Platz 1, 10707 Berlin                                           |
|                | Ethik-Kommission des Landes Sachsen-Anhalt (local)<br>Geschäftsstelle, Kühnauer Str. 70, 06846 Dessau-Roßlau                                                                                 |

|         |                                                                                                                                                                             |
|---------|-----------------------------------------------------------------------------------------------------------------------------------------------------------------------------|
|         | Ethik-Kommission der Ärztekammer Westfalen-Lippe und der Medizinischen Fakultät der Westfälischen Wilhelms-Universität Münster (local)<br>Gartenstr. 210–214, 48147 Münster |
|         | Landesärztekammer Hessen, Ethikkommission (local)<br>Im Vogelsang 3, 60488 Frankfurt am Main                                                                                |
|         | Sächsische Landesärztekammer, Ethikkommission (local)<br>Schützenhöhe 16–18, 01099 Dresden                                                                                  |
|         | Ärztekammer Hamburg, Ethikkommission (local)<br>Humboldtstr. 67a, 22083 Hamburg                                                                                             |
|         | Landesärztekammer Rheinland-Pfalz, Ethikkommission (local)<br>Deutschhausplatz 3, 55116 Mainz                                                                               |
|         | Ärztekammer Nordrhein, Ethikkommission (local)<br>Tersteegenstr. 9, 40474 Düsseldorf                                                                                        |
|         | Ethikkommission der Medizinischen Fakultät der Universität Rostock (local)<br>Institut für Rechtsmedizin, St. Georg-Str. 108                                                |
|         | Ärztekammer Niedersachsen, Ethikkommission (local)<br>Berliner Allee 20, 30175 Hannover                                                                                     |
|         | Bayerische Landesärztekammer, Ethikkommission (local)<br>Mühlbaurstr. 16, 81677 München                                                                                     |
| Hungary | Egészségügyi Tudományos Tanács Klinikai Farmakológiai Etikai Bizottsága<br>Arany J. u. 6–8, Budapest, H-1051                                                                |

|                   |                                                                                                                                                                                             |
|-------------------|---------------------------------------------------------------------------------------------------------------------------------------------------------------------------------------------|
| Italy             | Comitato Etico Locale per la Sperimentazione Clinica dei Medicinali dell'Azienda Ospedaliero ra Universitaria ria Senese di Siena (central)<br>c/o Farmacia AOUS Viale Bracci, Siena, 53100 |
|                   | Comitato Etico Unico per la Provincia di Parma (local)<br>Via Gramsci, 14, Parma, 43100                                                                                                     |
|                   | Comitato per la Sperimentazione Clinica Medicinali dell'Azienda Ospedaliero Universitaria Pisana di Pisa (local)<br>Via Roma 67, Pisa, 56100                                                |
|                   | Comitato Etico dell'Azienda Ospedaliero Universiitaria S.Martino di Genova (local)<br>Largo Rosanna Benzi, 10, Genova, 16132                                                                |
| Republic of Korea | IRB of Ewha Womans University Mokdong Hospital (local)<br>1071, Anyangcheon-ro, YangCheon-Ku, Seoul, 158-710                                                                                |
|                   | IRB of Korea University Anam Hospital (local)<br>73 Inchon-ro, Seongbuk-Gu, Seoul, 136-705                                                                                                  |
|                   | IRB of Hallym University Sacred Heart Hospital (local)<br>896 Pyeongchon-dong, Dongan-gu, Anyang-si, 431-070                                                                                |
|                   | IRB of The Catholic University of Korea (local)<br>Seoul St.Mary's Hospital 222 Banpo-Daero, Seocho-gu, Seoul, 137-701                                                                      |
|                   | IRB of Soonchunhyang University Bucheon Hospital (local)<br>1174 Joong-dong, Wonmi-gu, Buchon-si, 420-767                                                                                   |
|                   | IRB of Korea University Guro Hospital (local)<br>148 Gurodong-ro, Guro-Gu, Seoul, 152-703                                                                                                   |

|                    |                                                                                                                                        |
|--------------------|----------------------------------------------------------------------------------------------------------------------------------------|
|                    | IRB of Yonsei University Wonju Christian Hospital (local)<br>20 Ilsan-Ro, Wonju-Si, 220-701                                            |
|                    | IRB of Seoul National Hospital (local)<br>101 Daehak-ro Jongno-gu, Seoul, 110-744                                                      |
| Netherlands        | METC Catharina ziekenhuis<br>Michelangelo laan 2, Eindhoven, 5623 EJ                                                                   |
| Poland             | Komisja Bioetyczna przy Instytucie Gruzlicy I Chorob Pluc<br>ul. Plocka 26, Warszawa, 01-138                                           |
| Romania            | Comisia Nationala de Etica<br>Str. Aviator Sanatescu Nr. 48, Bucuresti, Sector 1,01                                                    |
| Russian Federation | Ethical Council at the MoH of RF (central)<br>3 Rakhmanovsky Pereulok, Moscow, 127994                                                  |
|                    | LEC at City Clinical Hospital #23 n.a. Medsantrud (local)<br>11, Yauzskaya str, Moscow, 109240                                         |
|                    | LEC FA of HealthCare and SD StP Rheumatology Clinical Hosp.#25 (local)<br>47, Piskarevsky prospect, St. Petersburg, 195067             |
|                    | LEC at SRI of Therapy of Siberian branch of Russian Academy of Medical Sciences (local)<br>175/1, B.Bogatkova str, Novosibirsk, 630089 |
|                    | LEC at StP SMU n.a. acad. I.P. Pavlov (local)<br>10, Rentgena str.Saint-Petersburg, 197101                                             |
|                    | LEC at FSd ESMC of presed. RF City Hospital #17 (local)<br>Volynskaya, 7, Moscow, 119620                                               |

|              |                                                                                                                                                                            |
|--------------|----------------------------------------------------------------------------------------------------------------------------------------------------------------------------|
| Slovakia     | Fakultná nemocnica s poliklinikou F.D. Roosevelta (central)<br>Nám. L. Svobodu 1, 975 17 Banská Bystrica                                                                   |
|              | Nitriansky samosprávny kraj Úrad Nitrianskeho samosprávneho kraja Etická komisia (local)<br>Štefánikova tr. 69, 949 01 Nitra                                               |
|              | Bratislavský samosprávny kraj, Úrad samosprávneho kraja, Etická komisia (local)<br>Sabinovská 16, P.O. Box 106, 820 05 Bratislava 25                                       |
|              | Košický samosprávny kraj, Úrad Košického samosprávneho kraja Etická komisia (local)<br>Námestie Maratónu mieru 1, 042 66 Košice                                            |
|              | NsP Sv. Jakuba, n.o. (local)<br>Bardejov, ul. Sv. Jakuba 21, 085 01 Bardejov                                                                                               |
|              | EK-Narodny ustav TBC, pľucnych chorob a hrudnikovej chirurgie (local)<br>Vysne Hagy, Vysne Hagy, 05984                                                                     |
| South Africa | Pharma Ethics (local)<br>123 Amcor Road, Lyttelton Manor 0157                                                                                                              |
|              | University of Cape Town Ethics Committee (local)<br>Faculty of Health Sciences Research EC, E52-24 Old Main Building, Groote Schuur Hospital, Observatory, Cape Town, 7925 |
|              | University of Stellenbosch Ethics Committee (local)<br>Faculty of Health Sciences, Francie van Zijl Drive, Cape Town, 7505                                                 |
|              | University of Pretoria, Research Ethics Committee (local)<br>31 Bophelo Road, HW Snyman South Building, Level 2, Room 2:34, Pretoria, Gauteng, 0001                        |

|         |                                                                                                                                                                            |
|---------|----------------------------------------------------------------------------------------------------------------------------------------------------------------------------|
| Spain   | CEIC Hospital Universitario Puerta de Hierro Majadahonda, Planta 1ª, Pasillo unidades, administrativas de servicios (central)<br>c/ Manuel de Falla, 1, Majadahonda, 28222 |
|         | CEIC Institut Municipal d'Assistència Sanitària (local)<br>C/ Doctor Aiguader, 88 Edifici PRBB Barcelona, 08003                                                            |
|         | Comité Ético de Investigación Clínica de Asturias (local)<br>C/ Celestino Villamil, s/n Oviedo, 33006                                                                      |
|         | CEIC Hospital virgen de la Macarena (local)<br>Dirección: Avda. Dr. Fedriani, 3 – Unidad de Investigación 2ª planta Sevilla, 41071                                         |
|         | CEIC del Complejo Hospitalario de Cáceres (local)<br>Avda. Pablo Naranjo s/n Caceres, 10003                                                                                |
|         | CEIC del IDIAP Jordi Gol i Gurina (local)<br>Gran Via de les Corts Catalanes, 587 atico Barcelona, 08007                                                                   |
|         | CEIC Hospital Germans Trias i Pujol (local)<br>Ctra. Canyet, s/n Badalona, 08916                                                                                           |
|         | CEIC Hospital general Carlos Haya (local)<br>Avda. Carlos Haya, s/n Málaga, 29010                                                                                          |
| Sweden  | Regionala etikprövningsnämnden i Lund<br>Box 133, Östra Vallgatan, 14/Östervångsvägen 1, Lund, 22100                                                                       |
| Ukraine | Central Ethics Commission of the Ministry of Health of Ukraine (central)<br>5, Narodnogo Opolchennya St., Kyiv, 03680                                                      |

|                |                                                                                                                                                                                              |
|----------------|----------------------------------------------------------------------------------------------------------------------------------------------------------------------------------------------|
|                | LEC "Kharkiv City Clinical Hospital # 13" (local)<br>137, Gagarin Av. Kharkiv, 61035                                                                                                         |
|                | LEC SI "National Institute of Phthiisology and Pulmonology named F.G.Yanovskyy of AMS of Ukr (local)<br>10, Amosova Str., Kyiv, 03680                                                        |
| United Kingdom | NRES Committee North West (central)<br>3rd Floor, Barlow House, 4 Minshull Street, Manchester, M1 3DZ                                                                                        |
|                | Bart's Health NHS Trust, Joint Research and Development Office (local)<br>Queen Mary Innovation Centre, 5 Walden Street, London, E1 2EF                                                      |
|                | The Royal Wolverhampton Hospitals NHS Trust, Research & Development Directorate (local)<br>The Chestnuts, Wolverhampton, West Midlands, WV10 0QP                                             |
|                | Cambridge University Hospitals NHS Foundation Trust (local)<br>Addenbrookes Hospital, Hills Road, Cambridge, CB2 0QQ                                                                         |
|                | Hull & East Yorkshire Hospitals NHS Trust (local)<br>Research & Development Department, 2nd Floor Daisy Building, Castle Hill Hospital, Castle Road, Cottingham,<br>East Yorkshire, HU16 5JQ |
|                | Bradford Teaching Hospitals NHS Foundation Trust (local)<br>Bradford Royal Infirmary, Room 6, Pharmacy Stores, Gate 7, Smith Lane, Bradford West Yorkshire, BD9 6RJ                          |
|                | NRES Committee West Midlands (local)<br>Prospect House, Fishing Line Road, Enfield, Redditch, B97 6EW                                                                                        |
|                | NRES Committee South Central (local)<br>Building L27, University of Reading, London Road, Reading, RG1 5AQ                                                                                   |



|                              |                                                                                                                                     |
|------------------------------|-------------------------------------------------------------------------------------------------------------------------------------|
|                              | North Tees & Hartlepool NHS Foundation Trust – R&D (local)<br>Hardwick Road, Stockton on Tees, TS19 8PE                             |
|                              | Wirral University Teaching Hospital NHS Foundation Trust (local)<br>Arrowe Park Hospital, Arrowe Park Road, Upton, Wirral, CH49 5PE |
|                              | NHS Royal Victoria Infirmary (local)<br>Queen Victoria Road, Newcastle Upon Tyne, Newcastle, NE1 4LP                                |
| <b>AUGMENT (NCT01437397)</b> |                                                                                                                                     |
| Australia                    | Bellberry Human Research Ethics Committee<br>229 Greenhill Road, Dulwich SA 5065, Australia                                         |
|                              | Flinders Clinical Research Ethics Committee<br>Bedford Park SA 5042, Australia                                                      |
|                              | Gold Coast Health Service District Human Research Ethics Committee<br>108 Nerang Street, Southport Qld 4215, Australia              |
|                              | Human Research Ethics Committee - D<br>St. Vincent's Health Melbourne, PO Box 2900, Fitzroy, Vic, 3065, Australia                   |
|                              | Hunter New England Human Research Ethics Committee<br>Locked Bag 1, New Lambton NSW 2305, Australia                                 |
|                              | Royal Adelaide Hospital Research Ethics Committee<br>North Terrace, Adelaide SA 5000, Australia                                     |

|             |                                                                                                                                                                                           |
|-------------|-------------------------------------------------------------------------------------------------------------------------------------------------------------------------------------------|
| Canada      | IRB Services (Institutional Review Board Services) (central)<br>372 Hollandview Trail, Suite 300 Aurora, Ontario L4G 0A5, Canada                                                          |
|             | Concordia Hospital Ethics Committee (local)<br>Concordia Hospital, 1095 Concordia Avenue, Winnipeg, Manitoba, R2K 3S8, Canada                                                             |
|             | University of British Columbia, Clinical Research Ethics Board Office (local)<br>Room 210, Research pavilion, 828 West 10th Avenue, Vancouver, British Columbia, V5Z 1L8, Canada          |
|             | University of Saskatchewan Biomedical, Ethics Review Board (local)<br>Research Ethics Office, University of Saskatchewan, Box 5000 RPO University, Saskatoon, Saskatchewan S7N 4J8 Canada |
| New Zealand | Multi-region Ethics Committee<br>c/- Ministry of Health, PO Box 5013, 1 the Terrace, Wellington, New Zealand                                                                              |
| USA         | Quorum Institutional Review Board (central)<br>1601 Fifth Avenue, Suite 1000, Seattle, WA 98101, USA                                                                                      |
|             | Creighton University IRB (local)<br>2500 California Plaza, Omaha, NE 68178, USA                                                                                                           |
|             | Greater LA-VA IRB (local)<br>11301 Wilshire Blvd., Building 114 Room 325, Los Angeles, CA 90073, USA                                                                                      |
|             | Human Studies Subcommittee Bay Pines VA Healthcare System (local)<br>Research and Development Service (151), 10000 Bay Pines Blvd., Bay Pines, FL 33744, USA                              |
|             | Institutional Review Board, University of Texas Health Science Center at Tyler (local)<br>11937 US Highway 271, Tyler, TX 75708, USA                                                      |

|                                                                                                                                                                  |
|------------------------------------------------------------------------------------------------------------------------------------------------------------------|
| Kansas City Veterans Affairs Medical Center IRB (local)<br>4801 East Linwood Blvd., #151, Kansas City, MO 64128, USA                                             |
| Mayo Clinic Office for Human Research Protection Institutional Review Board (IRB) (local)<br>201 Building Room 4-60, 200 1st Street SW, Rochester, MN 55905, USA |
| Mercy St. Vincent Medical Center Adult Investigational Review Board (local)<br>2213 Cherry St., Toledo, OH 43608, USA                                            |
| Sparks Institutional Review Board (local)<br>1001 Towson Avenue, PO Box 2406, Fort Smith, AR 72902-2406, USA                                                     |
| St. Luke's IRB (local)<br>232 S. Woods Mill Rd., Chesterfield, MO 63017, USA                                                                                     |
| UC Davis Medical Center IRB (local)<br>CTSC Building, 2921 Stockton Blvd, Suite 1400, Room 1429, Sacramento, CA 95817                                            |
| University of California San Diego Human Research Protections Program (local)<br>9500 Gilman Drive, Mail Code 0052, La Jolla, CA 92093-0052, USA                 |
| University of Illinois College of Medicine of Peoria Institutional Review Board (local)<br>One Illini Drive, Box 1649, Peoria, IL 61656-1649, USA                |
| Wake Forest University Health Sciences Office of Research / Institution Review Board (local)<br>Medical Center Blvd., Winston-Salem, NC 27157, USA               |
| Western Institutional Review Board (local)<br>3535 7th Avenue SW, Olympia, WA 98502, USA                                                                         |

**Notes:** <sup>a</sup>Adapted from Singh D, Jones PW, Bateman ED, et al. Efficacy and safety of acclidinium bromide/formoterol fumarate fixed-dose combinations compared with individual components and placebo in patients with COPD (ACLIFORM-COPD): a multicentre, randomised study.

*BMC Pulm Med.* 2014;14(1):178. Creative Commons license and disclaimer available from:

<http://creativecommons.org/licenses/by/4.0/legalcode>"<http://creativecommons.org/licenses/by/4.0/legalcode>.<sup>1</sup>

**Abbreviations:** IEC, independent ethics committee; IRB, Institutional Review Board.

**Table S2 Baseline patient demographics and characteristics analyzed by baseline airflow obstruction severity (safety population)**

|                                                        | Moderate airflow obstruction <sup>a</sup> |                      |                     |                    |                    | Severe airflow obstruction <sup>b</sup> |                      |                     |                    |                    |
|--------------------------------------------------------|-------------------------------------------|----------------------|---------------------|--------------------|--------------------|-----------------------------------------|----------------------|---------------------|--------------------|--------------------|
|                                                        | AB/FF 400/12 µg<br>(n=418)                | AB 400 µg<br>(n=410) | FF 12 µg<br>(n=434) | Placebo<br>(n=293) | Total<br>(n=1,555) | AB/FF 400/12 µg<br>(n=298)              | AB 400 µg<br>(n=304) | FF 12 µg<br>(n=275) | Placebo<br>(n=227) | Total<br>(n=1,104) |
| Age, mean years (SD)                                   | 63.1<br>(8.7)                             | 63.7<br>(9.0)        | 63.5<br>(8.3)       | 63.5<br>(8.6)      | 63.4<br>(8.6)      | 63.7<br>(8.2)                           | 63.6<br>(7.7)        | 63.6<br>(8.0)       | 64.0<br>(8.5)      | 63.7<br>(8.1)      |
| ≥65 years, n (%)                                       | 183<br>(43.8)                             | 197<br>(48.0)        | 207<br>(47.7)       | 135<br>(46.1)      | 722<br>(46.4)      | 142<br>(47.7)                           | 143<br>(47.0)        | 128<br>(46.5)       | 111<br>(48.9)      | 524<br>(47.5)      |
| Male, n (%)                                            | 242<br>(57.9)                             | 246<br>(60.0)        | 251<br>(57.8)       | 172<br>(58.7)      | 911<br>(58.6)      | 185<br>(62.1)                           | 191<br>(62.8)        | 171<br>(62.2)       | 138<br>(60.8)      | 685<br>(62.0)      |
| Caucasian, n (%)                                       | 390<br>(93.3)                             | 385<br>(93.9)        | 408<br>(94.0)       | 284<br>(96.9)      | 1,467<br>(94.3)    | 279<br>(93.6)                           | 285<br>(93.8)        | 259<br>(94.2)       | 210<br>(92.5)      | 1,033<br>(93.6)    |
| Current smoker, n (%)                                  | 209<br>(50.0)                             | 205<br>(50.0)        | 201<br>(46.3)       | 139<br>(47.4)      | 754<br>(48.5)      | 143<br>(48.0)                           | 145<br>(47.7)        | 144<br>(52.4)       | 120<br>(52.9)      | 552<br>(50.0)      |
| Mean cigarette consumption, pack-years (SD)            | 43.9<br>(22.4)                            | 43.5<br>(24.4)       | 45.1<br>(22.4)      | 49.6<br>(26.9)     | 45.2<br>(23.9)     | 50.4<br>(28.2)                          | 46.5<br>(22.3)       | 46.7<br>(22.5)      | 48.4<br>(26.1)     | 48.0<br>(24.9)     |
| Baseline FEV <sub>1</sub> , L (SD)                     | 1.652<br>(0.482)                          | 1.617<br>(0.502)     | 1.614<br>(0.485)    | 1.660<br>(0.520)   | 1.634<br>(0.496)   | 1.026<br>(0.318)                        | 1.045<br>(0.314)     | 1.054<br>(0.320)    | 1.035<br>(0.350)   | 1.040<br>(0.324)   |
| Percent predicted FEV <sub>1</sub> at baseline (SD), % | 57.9<br>(10.7)                            | 56.5<br>(10.6)       | 56.7<br>(11.2)      | 56.7<br>(10.3)     | 57.0<br>(10.8)     | 36.0<br>(8.2)                           | 36.4<br>(8.3)        | 36.5<br>(8.1)       | 35.7<br>(8.0)      | 36.2<br>(8.2)      |

|                                                          |               |               |               |               |                 |               |               |               |               |               |
|----------------------------------------------------------|---------------|---------------|---------------|---------------|-----------------|---------------|---------------|---------------|---------------|---------------|
| Baseline Dyspnea Index focal score (SD)                  | 6.8<br>(2.0)  | 6.8<br>(2.1)  | 6.7<br>(2.3)  | 6.9<br>(2.2)  | 6.8<br>(2.2)    | 5.8<br>(2.0)  | 6.1<br>(2.1)  | 6.0<br>(2.0)  | 5.9<br>(2.2)  | 6.0<br>(2.1)  |
| Number of exacerbations in previous 12 months, mean (SD) | 0.4<br>(0.8)  | 0.4<br>(0.7)  | 0.3<br>(0.8)  | 0.3<br>(0.6)  | 0.4<br>(0.8)    | 0.5<br>(1.0)  | 0.6<br>(1.0)  | 0.5<br>(0.8)  | 0.4<br>(0.7)  | 0.5<br>(0.9)  |
| 0, n (%)                                                 | 301<br>(72.0) | 307<br>(74.9) | 332<br>(76.5) | 229<br>(78.2) | 1,169<br>(75.2) | 199<br>(66.8) | 191<br>(62.8) | 171<br>(62.2) | 162<br>(71.4) | 723<br>(65.5) |
| ≥1, n (%)                                                | 117<br>(28.0) | 103<br>(25.1) | 102<br>(23.5) | 64<br>(21.8)  | 386<br>(24.8)   | 99<br>(33.2)  | 113<br>(37.2) | 104<br>(37.8) | 65<br>(28.6)  | 381<br>(34.5) |

**Notes:** <sup>a</sup>GOLD Stage II (moderate): FEV<sub>1</sub> ≥50% to <80% predicted and FEV<sub>1</sub>/FVC <0.70.<sup>2</sup> <sup>b</sup>GOLD Stage III (severe): FEV<sub>1</sub> ≥30% to <50% predicted and FEV<sub>1</sub>/FVC <0.70.<sup>2</sup>

**Abbreviations:** AB, aclidinium bromide; FEV<sub>1</sub>, forced expiratory volume in 1 second; FF, formoterol fumarate.

**Table S3 Baseline patient demographics and characteristics analyzed by patient age (safety population)**

|                                             | Patients aged <65 years    |                      |                     |                    |                    | Patients aged ≥65 years    |                      |                     |                    |                    |
|---------------------------------------------|----------------------------|----------------------|---------------------|--------------------|--------------------|----------------------------|----------------------|---------------------|--------------------|--------------------|
|                                             | AB/FF 400/12 µg<br>(n=393) | AB 400 µg<br>(n=376) | FF 12 µg<br>(n=379) | Placebo<br>(n=276) | Total<br>(n=1,424) | AB/FF 400/12 µg<br>(n=327) | AB 400 µg<br>(n=346) | FF 12 µg<br>(n=337) | Placebo<br>(n=250) | Total<br>(n=1,260) |
| Age, mean years (SD)                        | 57.1<br>(5.2)              | 57.2<br>(5.5)        | 57.2<br>(5.1)       | 57.1<br>(5.4)      | 57.2<br>(5.3)      | 70.9<br>(4.7)              | 70.7<br>(4.6)        | 70.6<br>(4.3)       | 71.0<br>(4.5)      | 70.8<br>(4.5)      |
| Male, n (%)                                 | 229<br>(58.3)              | 223<br>(59.3)        | 213<br>(56.2)       | 160<br>(58.0)      | 825<br>(57.9)      | 200<br>(61.2)              | 221<br>(63.9)        | 211<br>(62.6)       | 153<br>(61.2)      | 785<br>(62.3)      |
| Caucasian, n (%)                            | 369<br>(93.9)              | 348<br>(92.6)        | 359<br>(94.7)       | 260<br>(94.2)      | 1,336<br>(93.8)    | 303<br>(92.7)              | 329<br>(95.1)        | 314<br>(93.2)       | 240<br>(96.0)      | 1,186<br>(94.1)    |
| Current smoker, n (%)                       | 250<br>(63.6)              | 235<br>(62.5)        | 239<br>(63.1)       | 183<br>(66.3)      | 907<br>(63.7)      | 104<br>(31.8)              | 118<br>(34.1)        | 111<br>(32.9)       | 80<br>(32.0)       | 413<br>(32.8)      |
| Mean cigarette consumption, pack-years (SD) | 42.8<br>(22.3)             | 41.5<br>(20.9)       | 43.3<br>(20.5)      | 45.5<br>(22.5)     | 43.1<br>(21.5)     | 51.2<br>(27.4)             | 48.5<br>(25.9)       | 48.6<br>(23.9)      | 53.0<br>(29.9)     | 50.1<br>(26.7)     |
| Severity of airflow obstruction, n (%)      |                            |                      |                     |                    |                    |                            |                      |                     |                    |                    |
| Stage II (Moderate) <sup>a</sup>            | 235<br>(59.8)              | 213<br>(56.6)        | 227<br>(60.2)       | 158<br>(57.2)      | 833<br>(58.6)      | 183<br>(56.1)              | 197<br>(57.6)        | 207<br>(61.4)       | 135<br>(54.4)      | 722<br>(57.6)      |
| Stage III (Severe) <sup>b</sup>             | 156<br>(39.7)              | 161<br>(42.8)        | 147<br>(39.0)       | 116<br>(42.0)      | 580<br>(40.8)      | 142<br>(43.6)              | 143<br>(41.8)        | 128<br>(38.0)       | 111<br>(44.8)      | 524<br>(41.8)      |
| Baseline FEV <sub>1</sub> , L (SD)          | 1.512<br>(0.538)           | 1.461<br>(0.538)     | 1.514<br>(0.525)    | 1.504<br>(0.591)   | 1.498<br>(0.545)   | 1.238<br>(0.465)           | 1.284<br>(0.481)     | 1.265<br>(0.460)    | 1.247<br>(0.466)   | 1.260<br>(0.468)   |

|                                                          |                |                |                |                |                |                |                |                |                |                |
|----------------------------------------------------------|----------------|----------------|----------------|----------------|----------------|----------------|----------------|----------------|----------------|----------------|
| Percent predicted FEV <sub>1</sub> at baseline (SD), %   | 49.7<br>(14.7) | 47.6<br>(13.8) | 50.0<br>(14.7) | 47.8<br>(14.3) | 48.9<br>(14.4) | 47.4<br>(14.3) | 48.2<br>(14.1) | 47.7<br>(13.7) | 46.9<br>(13.9) | 47.6<br>(14.0) |
| Baseline Dyspnea Index focal score (SD)                  | 6.2<br>(2.1)   | 6.6<br>(2.2)   | 6.3<br>(2.2)   | 6.5<br>(2.3)   | 6.4<br>(2.2)   | 6.6<br>(2.0)   | 6.4<br>(2.1)   | 6.6<br>(2.2)   | 6.5<br>(2.2)   | 6.5<br>(2.1)   |
| Number of exacerbations in previous 12 months, mean (SD) | 0.5<br>(0.9)   | 0.5<br>(0.8)   | 0.5<br>(0.9)   | 0.3<br>(0.7)   | 0.4<br>(0.8)   | 0.4<br>(0.9)   | 0.5<br>(0.9)   | 0.4<br>(0.7)   | 0.3<br>(0.6)   | 0.4<br>(0.8)   |
| 0, n (%)                                                 | 270<br>(68.7)  | 254<br>(67.6)  | 261<br>(68.9)  | 212<br>(76.8)  | 997<br>(70.0)  | 233<br>(71.3)  | 251<br>(72.5)  | 248<br>(73.6)  | 184<br>(73.6)  | 916<br>(72.7)  |
| ≥1, n (%)                                                | 123<br>(31.3)  | 122<br>(32.4)  | 118<br>(31.1)  | 64<br>(23.2)   | 427<br>(30.0)  | 94<br>(28.7)   | 95<br>(27.5)   | 89<br>(26.4)   | 66<br>(26.4)   | 344<br>(27.3)  |

**Notes:** <sup>a</sup>GOLD Stage II (moderate): FEV<sub>1</sub> ≥50% to <80% predicted and FEV<sub>1</sub>/FVC <0.70.<sup>2</sup> <sup>b</sup>GOLD Stage III (severe): FEV<sub>1</sub> ≥30% to <50% predicted and FEV<sub>1</sub>/FVC <0.70.<sup>2</sup>

**Abbreviations:** AB, aclidinium bromide; FEV<sub>1</sub>, forced expiratory volume in 1 second; FF, formoterol fumarate; FVC, forced vital capacity.



**Table S4 Baseline patient demographics and characteristics analyzed by exacerbation history (safety population)**

|                                             | No exacerbations           |                      |                     |                    |                    | ≥1 exacerbations           |                      |                     |                    |                  |
|---------------------------------------------|----------------------------|----------------------|---------------------|--------------------|--------------------|----------------------------|----------------------|---------------------|--------------------|------------------|
|                                             | AB/FF 400/12 µg<br>(n=503) | AB 400 µg<br>(n=505) | FF 12 µg<br>(n=509) | Placebo<br>(n=396) | Total<br>(n=1,913) | AB/FF 400/12 µg<br>(n=217) | AB 400 µg<br>(n=217) | FF 12 µg<br>(n=207) | Placebo<br>(n=130) | Total<br>(n=771) |
| Age, mean years (SD)                        | 63.7<br>(8.7)              | 64.2<br>(8.2)        | 63.6<br>(8.4)       | 63.7<br>(8.6)      | 63.8<br>(8.5)      | 62.6<br>(8.1)              | 62.5<br>(9.0)        | 63.3<br>(7.8)       | 63.9<br>(8.4)      | 63.0<br>(8.3)    |
| ≥65 years, n (%)                            | 233<br>(46.3)              | 251<br>(49.7)        | 248<br>(48.7)       | 184<br>(46.5)      | 916<br>(47.9)      | 94<br>(43.3)               | 95<br>(43.8)         | 89<br>(43.0)        | 66<br>(50.8)       | 344<br>(44.6)    |
| Male, n (%)                                 | 296<br>(58.8)              | 322<br>(63.8)        | 310<br>(60.9)       | 241<br>(60.9)      | 1,169<br>(61.1)    | 133<br>(61.3)              | 122<br>(56.2)        | 114<br>(55.1)       | 72<br>(55.4)       | 441<br>(57.2)    |
| Caucasian, n (%)                            | 461<br>(91.7)              | 472<br>(93.5)        | 475<br>(93.3)       | 373<br>(94.2)      | 1,781<br>(93.1)    | 211<br>(97.2)              | 205<br>(94.5)        | 198<br>(95.7)       | 127<br>(97.7)      | 741<br>(96.1)    |
| Current smoker, n (%)                       | 251<br>(49.9)              | 251<br>(49.7)        | 244<br>(47.9)       | 208<br>(52.5)      | 954<br>(49.9)      | 103<br>(47.5)              | 102<br>(47.0)        | 106<br>(51.2)       | 55<br>(42.3)       | 366<br>(47.5)    |
| Mean cigarette consumption, pack-years (SD) | 48.0<br>(26.0)             | 46.4<br>(24.7)       | 46.4<br>(23.1)      | 50.1<br>(26.6)     | 47.6<br>(25.1)     | 43.5<br>(22.5)             | 41.3<br>(20.6)       | 44.4<br>(20.3)      | 46.2<br>(26.3)     | 43.6<br>(22.2)   |
| Severity of airflow obstruction, n (%)      |                            |                      |                     |                    |                    |                            |                      |                     |                    |                  |
| Stage II (Moderate) <sup>a</sup>            | 301<br>(60.0)              | 307<br>(61.3)        | 332<br>(65.4)       | 229<br>(58.1)      | 1169<br>(61.4)     | 117<br>(53.9)              | 103<br>(47.5)        | 102<br>(49.5)       | 64<br>(49.2)       | 386<br>(50.1)    |
| Stage III (Severe) <sup>b</sup>             | 199<br>(39.6)              | 191<br>(38.1)        | 171<br>(33.7)       | 162<br>(41.1)      | 723<br>(38.0)      | 99<br>(45.6)               | 113<br>(52.1)        | 104<br>(50.5)       | 65<br>(50.0)       | 381<br>(49.5)    |

|                                                          |                  |                  |                  |                  |                  |                  |                  |                  |                  |                  |
|----------------------------------------------------------|------------------|------------------|------------------|------------------|------------------|------------------|------------------|------------------|------------------|------------------|
| Baseline FEV <sub>1</sub> , L (SD)                       | 1.410<br>(0.540) | 1.410<br>(0.507) | 1.447<br>(0.510) | 1.414<br>(0.566) | 1.421<br>(0.529) | 1.335<br>(0.482) | 1.297<br>(0.538) | 1.272<br>(0.491) | 1.286<br>(0.487) | 1.299<br>(0.501) |
| Percent predicted FEV <sub>1</sub> at baseline (SD), %   | 49.5<br>(14.6)   | 48.6<br>(13.8)   | 50.1<br>(14.1)   | 47.9<br>(14.3)   | 49.1<br>(14.2)   | 46.7<br>(14.4)   | 46.2<br>(14.1)   | 45.9<br>(14.4)   | 45.8<br>(13.6)   | 46.2<br>(14.2)   |
| Baseline Dyspnea Index focal score (SD)                  | 6.6<br>(2.1)     | 6.6<br>(2.2)     | 6.6<br>(2.2)     | 6.6<br>(2.2)     | 6.6<br>(2.2)     | 6.0<br>(1.9)     | 6.2<br>(2.1)     | 6.0<br>(2.2)     | 6.1<br>(2.1)     | 6.0<br>(2.1)     |
| Number of exacerbations in previous 12 months, mean (SD) | 0<br>(0.0)       | 0<br>(0.0)       | 0<br>(0.0)       | 0<br>(0.0)       | 0<br>(0.0)       | 1.5<br>(1.0)     | 1.5<br>(0.9)     | 1.4<br>(0.9)     | 1.3<br>(0.6)     | 1.5<br>(0.9)     |

**Notes:** <sup>a</sup>GOLD Stage II (moderate): FEV<sub>1</sub> ≥50% to <80% predicted and FEV<sub>1</sub>/FVC <0.70.<sup>2</sup> <sup>b</sup>GOLD Stage III (severe): FEV<sub>1</sub> ≥30% to <50% predicted and FEV<sub>1</sub>/FVC <0.70.<sup>2</sup>

**Abbreviations:** AB, aclidinium bromide; FEV<sub>1</sub>, forced expiratory volume in 1 second; FF, formoterol fumarate.

**Table S5 Baseline patient demographics and characteristics analyzed by patient sex (safety population)**

|                                             | Female                     |                      |                     |                    |                    | Male                       |                      |                     |                    |                    |
|---------------------------------------------|----------------------------|----------------------|---------------------|--------------------|--------------------|----------------------------|----------------------|---------------------|--------------------|--------------------|
|                                             | AB/FF 400/12 µg<br>(n=291) | AB 400 µg<br>(n=278) | FF 12 µg<br>(n=292) | Placebo<br>(n=213) | Total<br>(n=1,074) | AB/FF 400/12 µg<br>(n=429) | AB 400 µg<br>(n=444) | FF 12 µg<br>(n=424) | Placebo<br>(n=313) | Total<br>(n=1,610) |
| Age, mean years (SD)                        | 63.4<br>(8.8)              | 63.3<br>(8.7)        | 62.3<br>(8.2)       | 63.1<br>(8.2)      | 63.0<br>(8.5)      | 63.4<br>(8.3)              | 63.9<br>(8.3)        | 64.3<br>(8.1)       | 64.2<br>(8.8)      | 63.9<br>(8.4)      |
| ≥65 years, n (%)                            | 127<br>(43.6)              | 125<br>(45.0)        | 126<br>(43.2)       | 97<br>(45.5)       | 475<br>(44.2)      | 200<br>(46.6)              | 221<br>(49.8)        | 211<br>(49.8)       | 153<br>(48.9)      | 785<br>(48.8)      |
| Caucasian, n (%)                            | 278<br>(95.5)              | 270<br>(97.1)        | 279<br>(95.5)       | 208<br>(97.7)      | 1,035<br>(96.4)    | 394<br>(91.8)              | 407<br>(91.7)        | 394<br>(92.9)       | 292<br>(93.3)      | 1,487<br>(92.4)    |
| Current smoker, n (%)                       | 156<br>(53.6)              | 135<br>(48.6)        | 147<br>(50.3)       | 119<br>(55.9)      | 557<br>(51.9)      | 198<br>(46.2)              | 218<br>(49.1)        | 203<br>(47.9)       | 144<br>(46.0)      | 763<br>(47.4)      |
| Mean cigarette consumption, pack-years (SD) | 42.5<br>(22.7)             | 40.0<br>(21.1)       | 41.7<br>(19.6)      | 47.0<br>(24.3)     | 42.5<br>(22.0)     | 49.5<br>(26.2)             | 47.9<br>(24.7)       | 48.6<br>(23.6)      | 50.6<br>(27.9)     | 49.0<br>(25.5)     |
| Severity of airflow obstruction, n (%)      |                            |                      |                     |                    |                    |                            |                      |                     |                    |                    |
| Stage II (Moderate) <sup>a</sup>            | 176<br>(60.7)              | 164<br>(59.2)        | 183<br>(62.9)       | 121<br>(57.1)      | 644<br>(60.2)      | 242<br>(56.4)              | 246<br>(55.8)        | 251<br>(59.3)       | 172<br>(55.1)      | 911<br>(56.8)      |
| Stage III (Severe) <sup>b</sup>             | 113<br>(39.0)              | 113<br>(40.8)        | 104<br>(35.7)       | 89<br>(42.0)       | 419<br>(39.2)      | 185<br>(43.1)              | 191<br>(43.3)        | 171<br>(40.4)       | 138<br>(44.2)      | 685<br>(42.7)      |
| Baseline FEV <sub>1</sub> , L (SD)          | 1.157<br>(0.414)           | 1.110<br>(0.373)     | 1.163<br>(0.421)    | 1.097<br>(0.364)   | 1.135<br>(0.397)   | 1.544<br>(0.533)           | 1.543<br>(0.528)     | 1.558<br>(0.505)    | 1.576<br>(0.570)   | 1.554<br>(0.532)   |

|                                                          |                |                |                |                |                |                |                |                |                |                 |
|----------------------------------------------------------|----------------|----------------|----------------|----------------|----------------|----------------|----------------|----------------|----------------|-----------------|
| Percent predicted FEV <sub>1</sub> at baseline (SD), %   | 49.2<br>(14.5) | 47.8<br>(14.0) | 48.9<br>(14.8) | 46.6<br>(13.5) | 48.2<br>(14.3) | 48.3<br>(14.6) | 48.0<br>(13.9) | 48.9<br>(14.0) | 47.9<br>(14.6) | 48.3<br>(14.2)  |
| Baseline Dyspnea Index focal score (SD)                  | 6.1<br>(2.0)   | 6.6<br>(2.2)   | 6.2<br>(2.2)   | 6.6<br>(2.0)   | 6.4<br>(2.1)   | 6.6<br>(2.1)   | 6.4<br>(2.1)   | 6.6<br>(2.2)   | 6.4<br>(2.3)   | 6.5<br>(2.2)    |
| Number of exacerbations in previous 12 months, mean (SD) | 0.4<br>(0.8)   | 0.5<br>(0.9)   | 0.5<br>(0.9)   | 0.3<br>(0.7)   | 0.5<br>(0.9)   | 0.5<br>(0.9)   | 0.4<br>(0.8)   | 0.4<br>(0.7)   | 0.3<br>(0.7)   | 0.4<br>(0.8)    |
| 0, n (%)                                                 | 207<br>(71.1)  | 183<br>(65.8)  | 199<br>(68.2)  | 155<br>(72.8)  | 744<br>(69.3)  | 296<br>(69.0)  | 322<br>(72.5)  | 310<br>(73.1)  | 241<br>(77.0)  | 1,169<br>(72.6) |
| ≥1, n (%)                                                | 84<br>(28.9)   | 95<br>(34.2)   | 93<br>(31.8)   | 58<br>(27.2)   | 330<br>(30.7)  | 133<br>(31.0)  | 122<br>(27.5)  | 114<br>(26.9)  | 72<br>(23.0)   | 441<br>(27.4)   |

**Notes:** <sup>a</sup>GOLD Stage II (moderate): FEV<sub>1</sub> ≥50% to <80% predicted and FEV<sub>1</sub>/FVC <0.70.<sup>2</sup> <sup>b</sup>GOLD Stage III (severe): FEV<sub>1</sub> ≥30% to <50% predicted and FEV<sub>1</sub>/FVC <0.70.<sup>2</sup>

**Abbreviations:** AB, aclidinium bromide; FEV<sub>1</sub>, forced expiratory volume in 1 second; FF, formoterol fumarate.

## References

1. Singh D, Jones PW, Bateman ED, et al. Efficacy and safety of aclidinium bromide/formoterol fumarate fixed-dose combinations compared with individual components and placebo in patients with COPD (ACLIFORM-COPD): a multicentre, randomised study. *BMC Pulm Med.* 2014;14(1):178.
2. Global Initiative for Chronic Obstructive Lung Disease. Global strategy for the diagnosis, management, and prevention of chronic obstructive pulmonary disease; 2018. Available from: [https://goldcopd.org/wp-content/uploads/2017/11/GOLD-2018-v6.0-FINAL-revised-20-Nov\\_WMS.pdf](https://goldcopd.org/wp-content/uploads/2017/11/GOLD-2018-v6.0-FINAL-revised-20-Nov_WMS.pdf) Accessed October 11, 2018.
