# Supplementary material for: Efficacy of aclidinium/formoterol 400/12 µg, analyzed by airflow obstruction severity, age, sex, and exacerbation history: pooled analysis of ACLIFORM and AUGMENT
Source: PubMed Central journal article supplement — Int J Chron Obstruct Pulmon Dis. 2019 Feb 26;14:479–91. doi: 10.2147/COPD.S185502 (PMC6396834; doi:10.2147/copd.s185502), 2019-02-26
Supplement: COPD-14-479-185502.pdf [file COPD-14-479-185502.pdf]

**Figure S1 Study design of ACLIFORM and AUGMENT**

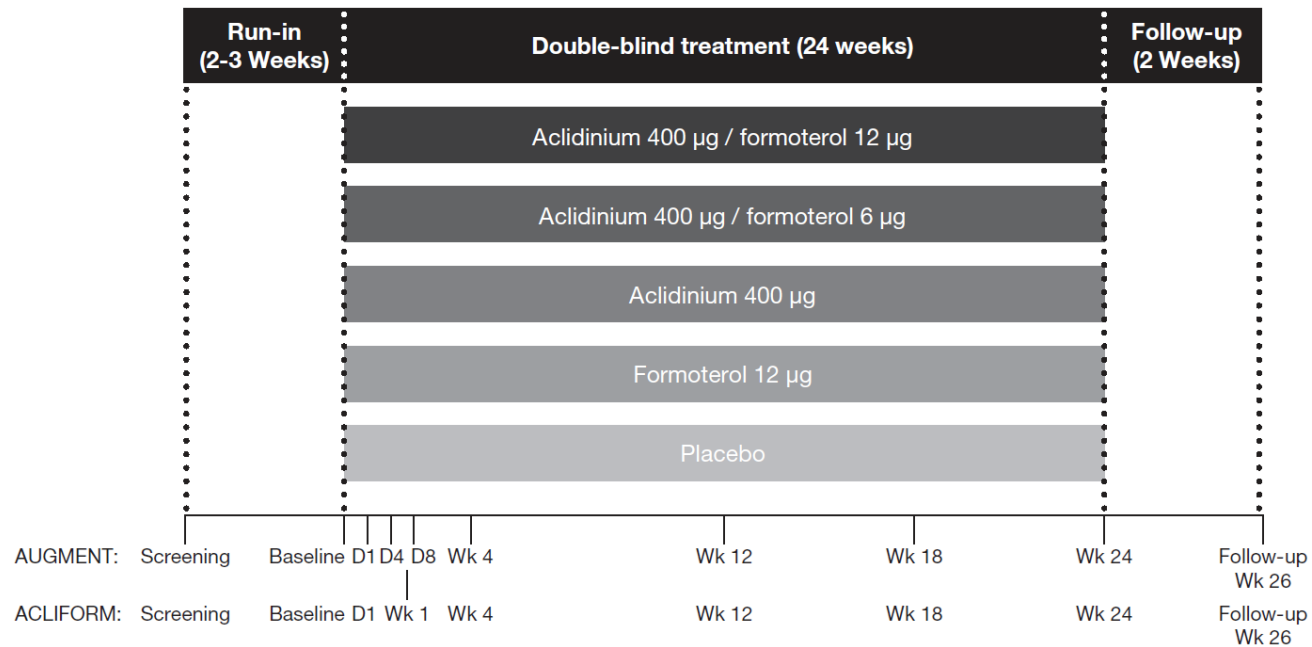

**Notes:** Patients were randomized 2:2:2:2:1 (ACLIFORM) or 1:1:1:1:1 (AUGMENT) to receive acclidinium/formoterol 400/12 µg, acclidinium/formoterol 400/6 µg, acclidinium 400 µg, formoterol 12 µg, or placebo twice daily via a multidose dry powder inhaler (DPI) (Genuair™/Pressair®<sup>a</sup>). Of the two doses of acclidinium/formoterol, only the therapeutic dose (400/12 µg) was assessed in this pooled post-hoc analysis.

Adapted from D'Urzo AD, Rennard SI, Kerwin EM, et al. Efficacy and safety of fixed-dose combinations of acclidinium bromide/formoterol fumarate: the 24-week, randomized, placebo-controlled AUGMENT COPD study. *Respir Res* 2014 15(1):123. Creative Commons license and disclaimer available from: <http://creativecommons.org/licenses/by/4.0/legalcode><sup>1</sup>

<sup>a</sup>Registered trademarks of the AstraZeneca group of companies; for use within the USA as Pressair® and Genuair™ within all other licensed territories.

**Figure S2 Efficacy endpoints at Week 24 analyzed by patient sex: (A) percentage change from baseline in morning pre-dose (trough) FEV<sub>1</sub> and (B) percentage change from baseline in morning 1-hour post-dose FEV<sub>1</sub> (pooled ITT population)**

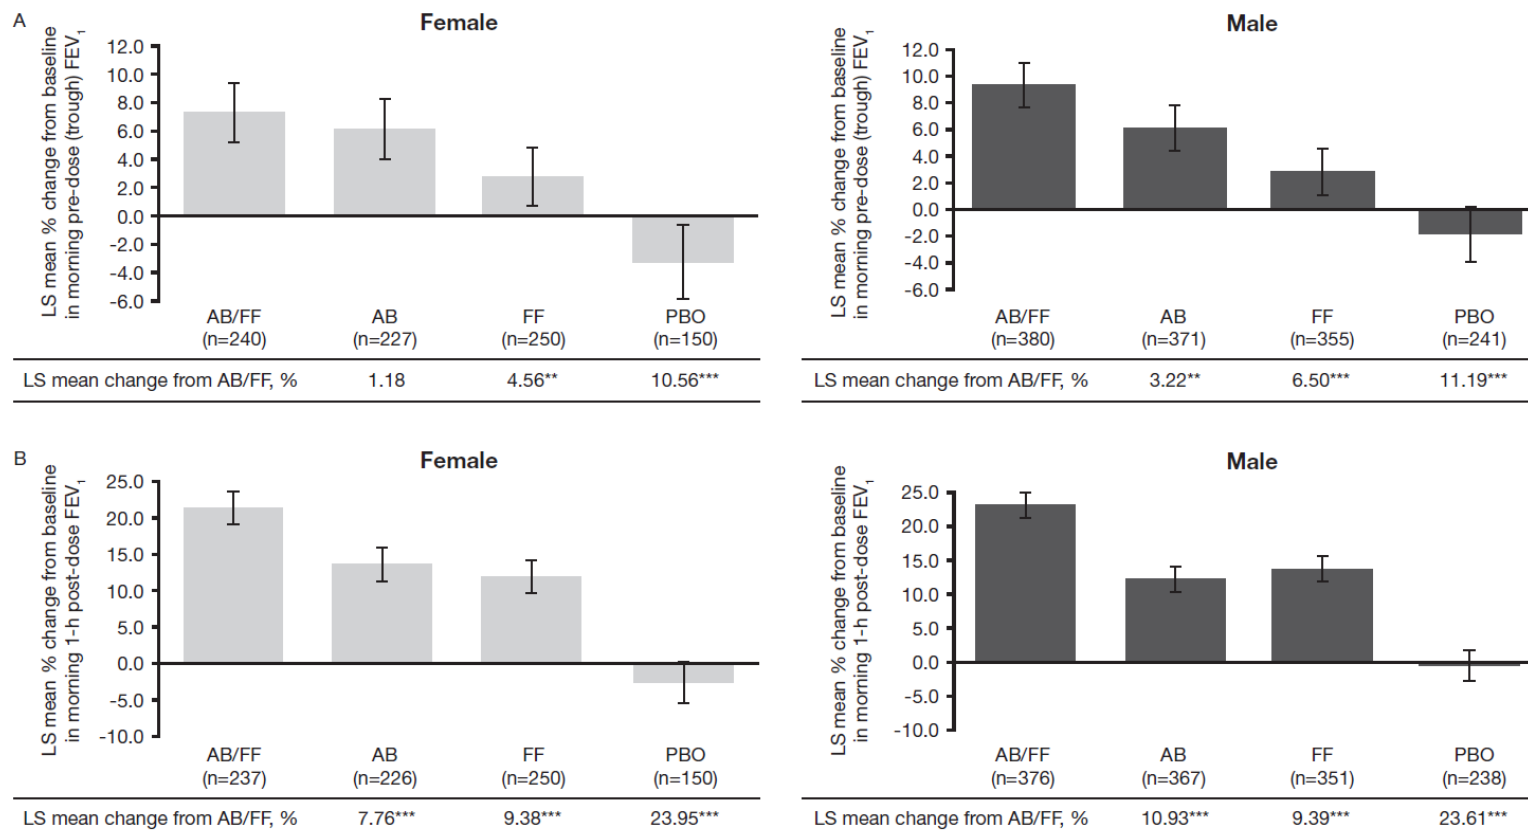

**Notes:** \*\*p<0.01; \*\*\*p<0.001. Analysis based on the mixed model for repeated measures in pooled ITT population. Error bars represent 95% confidence intervals.

**Abbreviations:** AB, acclidinium bromide; FEV<sub>1</sub>, forced expiratory volume in 1 second; FF, formoterol fumarate; ITT, intent-to-treat; LS, least squares; PBO, placebo.

## Reference

1. D'Urzo AD, Rennard SI, Kerwin EM, et al. Efficacy and safety of fixed-dose combinations of aclidinium bromide/formoterol fumarate: the 24-week, randomized, placebo-controlled AUGMENT COPD study. *Respir Res.* 2014;15(1):123.
